# Supplementary material
Source: publisher figshare collection journal article supplement (https://gsapubs.figshare.com/ndownloader/files/23292710)
Supplement: Supplementary file 1 [file 23292710]

**SUPPLEMENTARY MATERIAL - DATA REPOSITORY 2011247 (Ferrière et al.)**

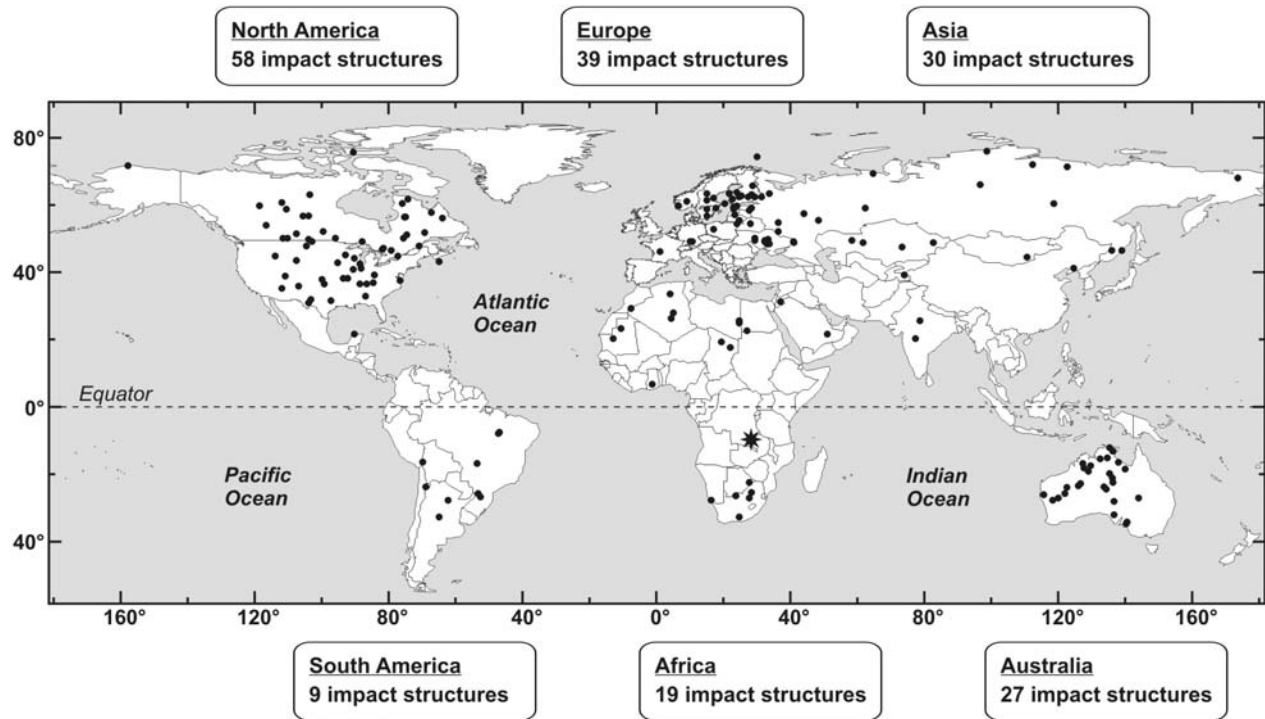

Figure DR1. Distribution map of the 182 confirmed meteorite impact structures on Earth, including the Luizi (this work). Data modified from Earth Impact Database (2010); Calvin crater (Michigan, U.S.A) is not reported as no definite evidence for meteorite impact origin have been founded so far for this structure; Four recently confirmed meteorite impact structures (not included in Earth Impact Database, 2010) are also reported, namely: Carancas (Kenkmann et al., 2009), Matt Wilson (Kenkmann and Poelchau, 2009), Ritland (Kalleson et al., 2010), and Suvasvesi South (Donaldini et al., 2006). The Luizi structure is shown with a large black star.

**TABLE DR1. PDF SET ABUNDANCES AND INDEXED PDF CRYSTALLOGRAPHIC ORIENTATIONS IN QUARTZ GRAINS FROM SAMPLES LUI10-09-05 FROM THE LUIZI IMPACT STRUCTURE, AS DETERMINED USING THE U-STAGE**

|                                                                                      |      |
|--------------------------------------------------------------------------------------|------|
| No. of investigated grains                                                           | 104  |
| No. of measured sets                                                                 | 185  |
| No. of PDF sets/grain (N)                                                            | 1,78 |
| <u>PDF sets; % relative to total no. of quartz grains examined</u>                   |      |
| 1 set                                                                                | 41   |
| 2 sets                                                                               | 44   |
| 3 sets                                                                               | 11   |
| 4 sets                                                                               | 3    |
| 5 sets                                                                               | 1    |
| Total                                                                                | 100  |
| <u>Indexed PDF crystallographic orientations; absolute frequency (%)<sup>*</sup></u> |      |
| c {0001}                                                                             | 6    |
| {10 $\bar{1}$ 4}                                                                     | 9    |
| {10 $\bar{1}$ 4} // {10 $\bar{1}$ 3} <sup>†</sup>                                    | 33   |
| $\omega$ {10 $\bar{1}$ 3}                                                            | 46   |
| $\pi$ {10 $\bar{1}$ 2}                                                               | 3    |
| Unindexed                                                                            | 3    |
| Total                                                                                | 100  |

<sup>\*</sup>Method described in Ferrière et al. (2009).

<sup>†</sup>PDF planes which plot in the overlapping zone between {10 $\bar{1}$ 4} and {10 $\bar{1}$ 3} crystallographic orientations.

## REFERENCES CITED

- Donaldini, F., Plado, J., Werner, S.C., Salminen, J., Pesonen, L.J., and Lehtinen, M., 2006, New evidence for impact from the Suvasvesi South structure, Central East Finland, *in* Cockell, C.S., Koeberl, C., and Gilmour, I., eds, Biological processes associated with impact events: Heidelberg, Springer-Verlag, p. 287–307.
- Earth Impact Database, 2010, <http://www.unb.ca/passc/ImpactDatabase/> (November 2010).
- Ferrière, L., Morrow, J.R., Amgaa, T., and Koeberl, C., 2009, Systematic study of universal-stage measurements of planar deformation features in shocked quartz: implications for statistical significance and representation of results: *Meteoritics & Planetary Science*, v. 44, p. 925–940.
- Kalleson, E., Dypvik, H., and Riis, F., 2010, The Ritland impact structure, western Norway: Houston, Texas, Lunar and Planetary Institute, Lunar and Planetary Science XXXXI, abstract 1326.

- Kenkmann, T., and Poelchau, M.H., 2009, Low-angle collision with Earth: the elliptical impact crater Matt Wilson, Northern Territory, Australia: *Geology*, v. 37, p. 459–462.
- Kenkmann, T., Artemieva, N.A., Wünnemann, K., Poelchau, M.H., Elbeshausen, D., and Núñez Del Prado, H., 2009, The Carancas meteorite impact crater, Peru: geologic surveying and modeling of crater formation and atmospheric passage: *Meteoritics & Planetary Science*, v. 44, p. 985–1000.
